# Supplementary material for: Functional interplay between TFIIH and KAT2A regulates higher-order chromatin structure and class II gene expression
Source: PubMed Central journal article supplement (PMC6426930; doi:10.1038/s41467-019-09270-2), 2019-03-20
Supplement: 41467_2019_9270_MOESM2_ESM.pdf [file 41467_2019_9270_MOESM2_ESM.pdf]

## Description of Additional Supplementary Files

File Name: Supplementary Data 1

Description: Relates to Figure 6b and is a comparative analysis of RNA-seq data from XP-B/CS<sup>F99S</sup> and XP-B/CS<sup>F99S</sup>+XPB<sup>WT</sup> cells performed in triplicate.
